# Supplementary material for: Multiplicative, additive, and interactive associations of 25-hydroxyvitamin D with lung and prostate cancer
Source: Atypon-hosted journal article supplement (doi:10.1024/0300-9831/a000780), 2023-02-09
Supplement: 0300-9831_a000780_esm1.pdf [file 0300-9831_a000780_esm1.pdf]

**Electronic Supplementary Material 1.** Examples of interaction calculations.

**Abbreviations**

25(OH)D = 25-hydroxyvitamin D, LCA = Lung cancer, PCA = Prostate cancer, CI: Confidence interval, RR = Relative risk, OR = Odds ratio, RD = Risk difference, and SE = Standard error.

**Table E1.** Lung cancer among non-smokers.

| Smoking | Low 25(OH)D | No   | LCA | Risk   | 95% CI        |     |
|---------|-------------|------|-----|--------|---------------|-----|
| No      | No          | 1177 | 17  | 0.0142 | 0.0089–0.0227 | P00 |
|         | Yes         | 552  | 10  | 0.0178 | 0.0097–0.0324 | P01 |

*Note.* 95% CIs for  $R_{00}$  and  $R_{01}$  are the Wilson intervals (Brown et al. 2001).

The effect of low 25(OH)D concentrations in the absence of smoking: RR (95% CI) = 1.25 (0.58, 2.71), OR (95% CI) = 1.25 (0.57, 2.76), and RD (95% CI) = 0.0036 (-0.0082–0.0191).

$$\text{SE for } \ln(\text{RR}) = \sqrt{\frac{1}{10} + \frac{1}{17} - \frac{1}{10+552} - \frac{1}{17+1177}} = 0.3952$$

$$\text{Lower 95\% CI for RR} = e^{(\ln(1.2497) - 1.96 \times 0.3952)} = 0.5760$$

$$\text{Upper 95\% CI for RR} = e^{(\ln(1.2497) + 1.96 \times 0.3952)} = 2.7115$$

$$\text{SE for } \ln(\text{OR}) = \sqrt{\frac{1}{10} + \frac{1}{552} + \frac{1}{17} + \frac{1}{1177}} = 0.4019$$

$$\text{Lower 95\% CI for OR} = e^{(\ln(1.2543) - 1.96 \times 0.4019)} = 0.5706$$

$$\text{Upper 95\% CI for OR} = e^{(\ln(1.2543) + 1.96 \times 0.4019)} = 2.7574$$

Lower 95% CI for RD

$$= 0.0036 - \sqrt{(0.0178 - 0.0097)^2 + (0.0227 - 0.0142)^2} = -0.0082$$

Upper 95% CI for RD

$$= 0.0036 - \sqrt{(0.0142 - 0.0089)^2 + (0.0324 - 0.0178)^2} = -0.0191$$

**References**

Brown, L. D., Cai, T. T., & DasGupta, A. (2001). Interval estimation for a binomial proportion. *Statistical Science*, 16(2), 101–133.  
<https://doi.org/10.1214/ss/1009213286>

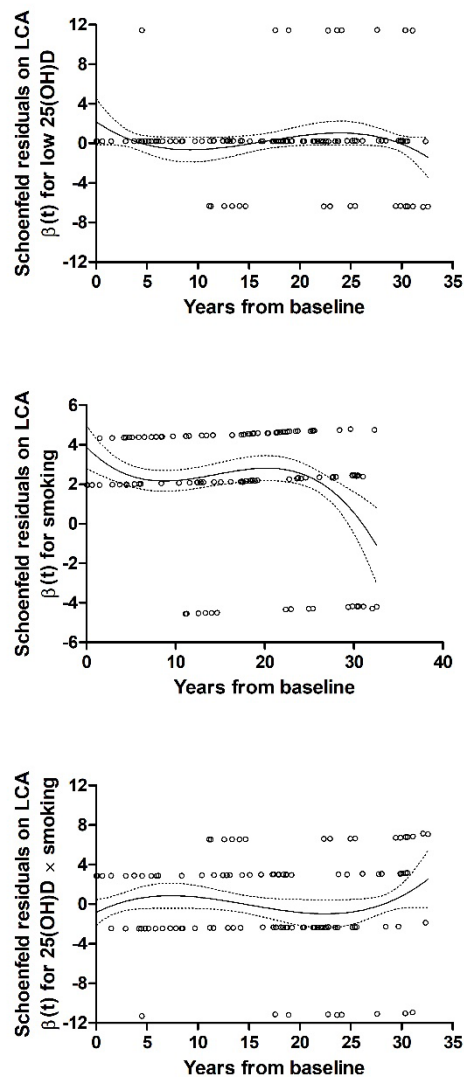

**Figure E1.** Schoenfeld residuals for the Cox proportional hazards model of lung cancer (LCA) with respect to circulating 25-hydroxyvitamin D [25(OH)D] concentrations (low vs. high, subfigure on the left,  $p = 0.977$  for  $H_0: \beta = 0$ ), smoking status (smoking vs. no smoking, subfigure in the middle,  $p = 0.003$ ), and the interaction between circulating 25(OH)D concentrations and smoking status (subfigure on the right,  $p = 0.325$ ). Lines represent 3<sup>rd</sup> order polynomial regressions, and dotted lines represent 95% confidence bands for the regressions.

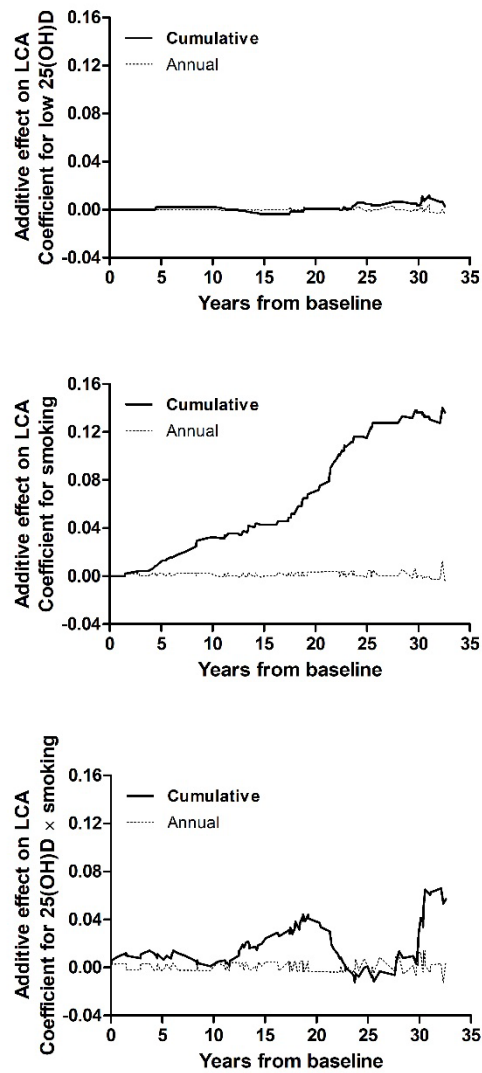

**Figure E2.** Additive effects of circulating 25-hydroxyvitamin D [25(OH)D] concentrations (low vs. high, subfigure on the left,  $p = 0.571$  for  $H_0: \beta = 0$ ), smoking status (smoking vs. no smoking, subfigure in the middle,  $p < 0.001$ ), and the interaction between circulating 25(OH)D concentrations and smoking status (subfigure on the right,  $p = 0.309$ ) on the hazard of incident lung cancer (LCA).

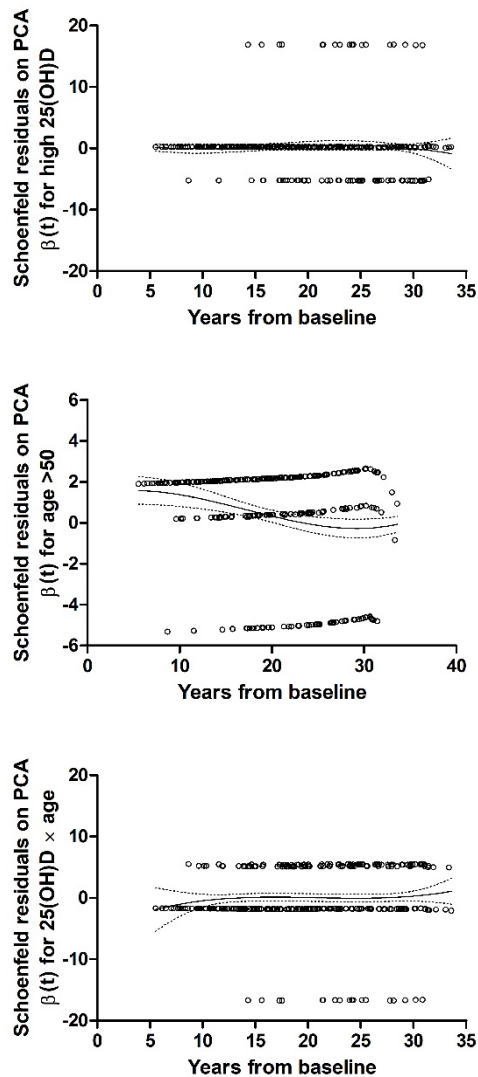

**Figure E3.** Schoenfeld residuals for the Cox proportional hazards model of prostate cancer (PCA) with respect to circulating 25-hydroxyvitamin D [25(OH)D] concentrations (high vs. low, subfigure on the left,  $p = 0.247$  for  $H_0: \beta = 0$ ), age (>50 vs. <50 years, subfigure in the middle,  $p = <0.001$ ), and the interaction between circulating 25(OH)D concentrations and age (subfigure on the right,  $p = 0.762$ ). Lines represent 3<sup>rd</sup> order polynomial regressions, and dotted lines represent 95% confidence bands for the regressions.

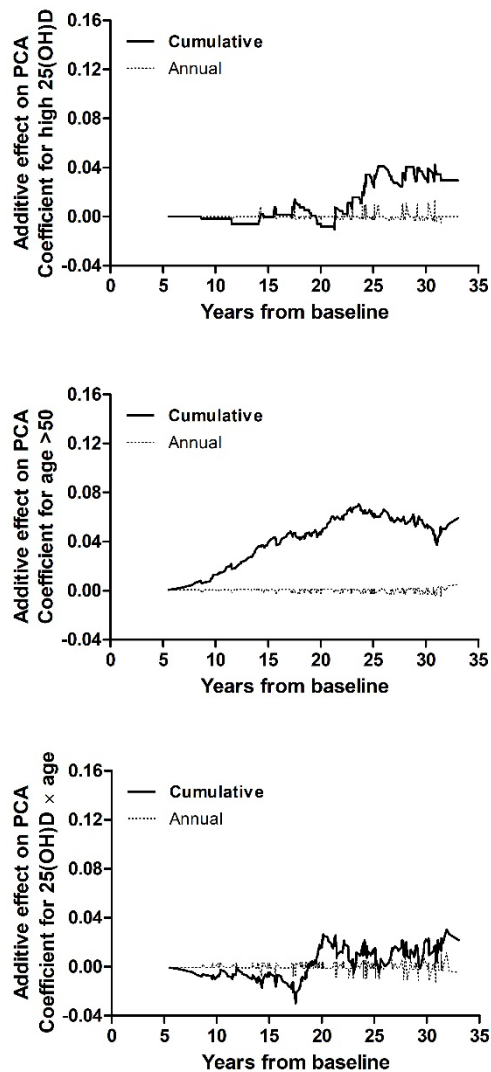

**Figure E4.** Additive effects of circulating 25-hydroxyvitamin D [25(OH)D] concentrations (high vs. low, subfigure on the left,  $p = 0.452$  for  $H_0: \beta = 0$ ), age (>50 vs. <50 years, subfigure in the middle,  $p = 0.003$ ), and the interaction between circulating 25(OH)D concentrations and age (subfigure on the right,  $p = 0.760$ ) on the hazard of prostate cancer (PCA).
